# Supplementary material
Source: PubMed Central journal article supplement (PMC6304038)
Supplement: rspb20181820supp1.pdf [file rspb20181820supp1.pdf]

**Micro-CT (BMD in mg HA/ccm)**

| BMD/TMD | Bone               |                    |                    | Ossicles           |                    |             |
|---------|--------------------|--------------------|--------------------|--------------------|--------------------|-------------|
|         | Human (BK)         | Mouse (Tb. Ver)    | Sperm Whale        | Human              | Mouse              | Sperm Whale |
| 1       | 903.4              | 1021.788           | 852.9              | 1199               | 908                | 1687        |
| 2       | 951.5              | 1019.478           | 848.97             | 1260.9             | 911                | 1708        |
| 3       | 789.6              | 1031.026           | 849.96             | 1157.9             | 926                | 1729        |
| mean    | <b>881.5</b>       | <b>1024.097333</b> | <b>850.61</b>      | <b>1205.933333</b> | <b>915</b>         | <b>1708</b> |
| SD      | <b>83.14210726</b> | <b>6.110551639</b> | <b>2.044040117</b> | <b>51.84885084</b> | <b>9.643650761</b> | <b>21</b>   |

| BMD/TMD | Teeth              |                    |                    |                    |                    |  |
|---------|--------------------|--------------------|--------------------|--------------------|--------------------|--|
|         | Human-Dentin       | Human-Enamel       | Mouse-Dentin       | Mouse-Enamel       | Sperm Whale-Dentin |  |
| 1       | 1209               | 1989.9             | 1228.296           | 2022.0909          | 1194.5             |  |
| 2       | 1185               | 1996.4             | 1217.9994          | 2023.8231          | 1177.4             |  |
| 3       | 1204               | 1953               | 1238.4962          | 2039.4122          | 1183.2             |  |
| mean    | <b>1199.333333</b> | <b>1979.766667</b> | <b>1228.263867</b> | <b>2028.442067</b> | <b>1185.033333</b> |  |
| SD      | <b>12.66227994</b> | <b>23.40733503</b> | <b>10.24843778</b> | <b>9.539811226</b> | <b>8.696167738</b> |  |

| qBEI<br>CaMean | Malleus     |             |             | Incus  |  |  | Stapes |  |  |
|----------------|-------------|-------------|-------------|--------|--|--|--------|--|--|
|                |             | 35.278      | 35.664      | 34.881 |  |  |        |  |  |
|                | 36.574      | 34.311      | 33.577      |        |  |  |        |  |  |
|                | 35.3        | 35.251      | 34.284      |        |  |  |        |  |  |
| mean           | 35.71733333 | 35.07533333 | 34.24733333 |        |  |  |        |  |  |
| SD             | 0.741976639 | 0.693394789 | 0.652772804 |        |  |  |        |  |  |

| N.Ot | Malleus     |             |             | Incus   |  |  | Stapes |  |  |
|------|-------------|-------------|-------------|---------|--|--|--------|--|--|
|      |             | 179.157     | 185.54      | 732.645 |  |  |        |  |  |
|      | 269.942     | 309.6       | 793.3       |         |  |  |        |  |  |
|      | 237.444     | 198.866     | 225.924     |         |  |  |        |  |  |
| mean | 228.8476667 | 231.3353333 | 583.9563333 |         |  |  |        |  |  |
| SD   | 45.99893223 | 68.1059036  | 311.5447336 |         |  |  |        |  |  |

| Lc.Ar | Malleus    |             |            | Incus  |  |  | Stapes |  |  |
|-------|------------|-------------|------------|--------|--|--|--------|--|--|
|       |            | 19.757      | 16.069     | 24.424 |  |  |        |  |  |
|       | 19.623     | 17.613      | 24.176     |        |  |  |        |  |  |
|       | 15.946     | 17.556      | 28.266     |        |  |  |        |  |  |
| mean  | 18.442     | 17.07933333 | 25.622     |        |  |  |        |  |  |
| SD    | 2.16263751 | 0.875438366 | 2.29312625 |        |  |  |        |  |  |

| Mn.Lc. | Malleus     |             |       | Incus |  |  | Stapes |  |  |
|--------|-------------|-------------|-------|-------|--|--|--------|--|--|
|        |             | 467.54      | 395.4 | 63.6  |  |  |        |  |  |
|        | 293.44      | 361.49      | 145   |       |  |  |        |  |  |
|        | 455         | 467.8       | 140.3 |       |  |  |        |  |  |
| mean   | 405.3266667 | 408.23      | 116.3 |       |  |  |        |  |  |
| SD     | 97.09934363 | 54.30387371 | 45.7  |       |  |  |        |  |  |

**Scaling (in cm)**

| Mouse | Stapes Length | Body Length | Stapes/Body | Skull Width | Stapes/Skull |
|-------|---------------|-------------|-------------|-------------|--------------|
|       | 12 weeks      | 0.062893    | 7.3         | 0.008615479 | 1.0          |
|       | 0.061701      | 7.2         | 0.008569583 | 1.0         | 0.061701     |
|       | 0.061024      | 7.1         | 0.00859493  | 0.98        | 0.062269388  |
| mean  | 0.061872667   | 7.2         | 0.008593331 | 0.993333333 | 0.062287796  |
| SD    | 0.000946252   | 0.1         | 2.29898E-05 | 0.011547005 | 0.000596213  |

| Human | Stapes Length  | Body Length | Stapes/Body | Skull Width | Stapes/Skull |
|-------|----------------|-------------|-------------|-------------|--------------|
|       | 21,22,23 years | 0.31        | 181         | 0.001712707 | 17           |
|       | 0.33           | 178         | 0.001853933 | 17.8        | 0.018539326  |
|       | 0.36           | 176         | 0.002045455 | 18.2        | 0.01978022   |
|       | 0.333333333    | 178.3333333 | 0.001870698 | 17.66666667 | 0.018851613  |
| 0     | 0.025166115    | 2.516611478 | 0.000167006 | 0.611010093 | 0.000818438  |

| Sperm Whale | Stapes Length  | Body Length | Stapes/Body | Skull Width | Stapes/Skull |
|-------------|----------------|-------------|-------------|-------------|--------------|
|             | 12,13,15 years | 0.479       | 1050        | 0.00045619  | 168          |
|             | 0.446          | 1140        | 0.000391228 | 170         | 0.002623529  |
|             | 0.459          | 1095        | 0.000419178 | 176         | 0.002607955  |
|             | 0.461333333    | 1095        | 0.000422199 | 171.3333333 | 0.002694225  |
| 0           | 0.016623277    | 45          | 3.25864E-05 | 4.163331999 | 0.000136159  |
